# Supplementary material
Source: PubMed Central journal article supplement (PMC3999757)
Supplement: supp_blood-2013-12-543363_blood-2013-12-543363-1.pdf [file supp_blood-2013-12-543363_blood-2013-12-543363-1.pdf]

## Supplementary Materials

### Detailed Materials and Methods

#### **Platelet preparation**

Blood was drawn from the retro-orbital plexus into heparinized tubes. Platelet-rich plasma (PRP) was obtained by centrifugation at 100g for 5 min. PRP was centrifuged at 700g in the presence of PGI<sub>2</sub> (5 μM) for 5 min at room temperature. After two washing steps, pelleted platelets were resuspended in modified Tyrode's Buffer (0.137 mM NaCl, 0.3 mM Na<sub>2</sub>HPO<sub>4</sub>, 2 mM KCl, 12 mM NaHCO<sub>3</sub>, 5 mM N-2-hydroxyethylpiperazine-N'-2-ethanesulfonic acid, 5 mM glucose, pH 7.3) containing 1 mM CaCl<sub>2</sub>.

#### **Spreading**

Platelet spreading experiments were performed as previously described<sup>1</sup>. Briefly, washed platelets were applied to glass coverslips coated with 100 μg/ml human fibrinogen. After 45 minutes at room temperature, platelets were fixed for 10 minutes with 4% paraformaldehyde/PBS and stained with FITC-phalloidin. Images were acquired with an Olympus FV1000 confocal microscope and platelet area calculated using ImageJ software.

#### **Aggregometry**

Washed platelets were re-suspended at a concentration of 2 x 10<sup>8</sup> platelets/ml in modified Tyrode's Buffer containing 0.35% BSA and 1mM CaCl<sub>2</sub>. The experiment was performed at 37°C in the presence of 50 μg/ml fibrinogen and under stirring conditions (1200 rpm). Platelet agonists were added and light transmission was recorded until it reached a plateau on a Chrono-log 4-channel optical aggregation system (Chrono-log, Havertown, PA).

#### **Rap1 activation assay**

Washed platelets (1.2 x 10<sup>8</sup> platelets/sample) were stimulated with 150 μM Par4-AP for 20 seconds or 5 minutes at 37°C in a standard aggregometer. Reactions were stopped with ice-cold 2x lysis buffer (100 mM Tris/HCl pH 7.4, 400 mM NaCl, 5 mM MgCl<sub>2</sub>, 2% Nonidet P-40, 20% glycerol and protease inhibitor cocktail lacking ethylenediaminetetraacetic acid). Cell lysis was completed on ice for 15 minutes. The cell lysates were incubated for 45 minutes with RaIGDS-RBD beads (Millipore, Billerica, MA) to pull-down Rap1-GTP<sup>2,3</sup>. After 3 washing steps the pellets were solubilized in sample buffer (75 mM Tris/HCl pH 6.8, 10% sodium dodecyl sulfate (SDS), 10% glycerol, 5% 2-Mercaptoethanol, 0.004% Bromophenol blue) for the detection of Rap1 by immunoblot. Small aliquots of each sample were saved to control that samples contained similar amounts of protein.

#### **Western blotting**

Proteins were separated by SDS-polyacrylamide gel electrophoresis on 4-20% gradient gels and transferred to polyvinylidene fluoride membranes. Standard western blotting procedures were used. Rap1 was detected with the Odyssey Infrared Imaging System (Li-Cor Biosystems).

1. Petrich BG, Fogelstrand P, Partridge AW, et al. The antithrombotic potential of selective blockade of talin-dependent integrin αIIbβ3 (platelet GPIIb-IIIa) activation. *J. Clin. Invest.* 2007;117(8):2250–2259.
2. Franke B, Akkerman JW, Bos JL. Rapid Ca<sup>2+</sup>-mediated activation of Rap1 in human platelets. *The EMBO Journal.* 1997;16(2):252–259.
3. Stefanini L, Roden RC, Bergmeier W. CalDAG-GEFI is at the nexus of calcium-dependent platelet activation. *Blood.* 2009;114(12):2506–2514.

Supplementary Figures and Figure Legends

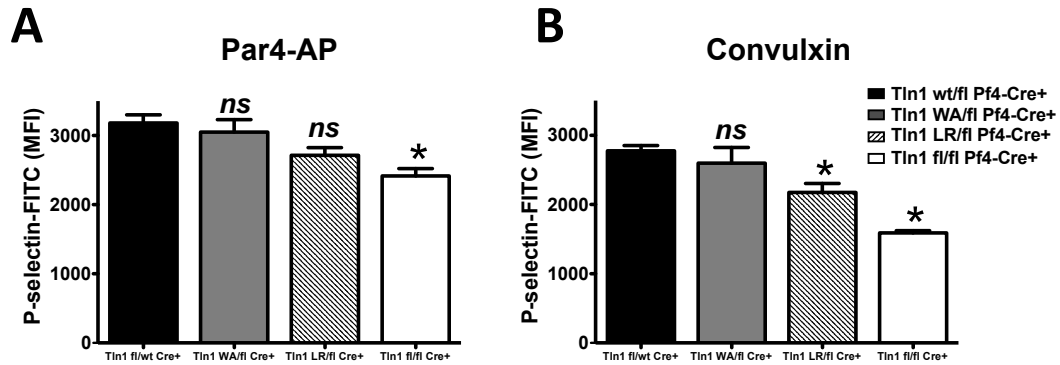

**Figure S1. Secretion of  $\alpha$ -granule (anti-CD62P antibody binding) in stimulated talin mutant platelets.** Washed platelets isolated from mice with the indicated genotypes were stimulated with 600 $\mu$ M PAR4 activating peptide (Par4-AP) (A) or 900ng/ml convulxin (B). Bar graphs represent mean fluorescence intensity (MFI)  $\pm$  SEM (n= 6, 3 independent experiments). \*  $p$ <0.05.

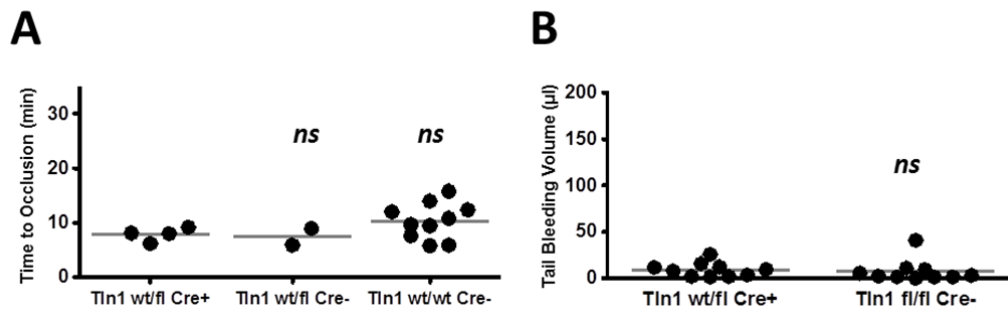

**Figure S2. Carotid artery thrombotic occlusion times and tail bleeding volumes in Tln1 wt/fl Cre+ mice.** A) Time to carotid artery occlusion following injury with 10% FeCl<sub>3</sub> in mice with the indicated genotypes. B) Blood loss volumes were measured in Tln1 wt/fl Cre+ and Tln1 fl/fl Cre- mice during the 10 minutes following tail resection as described in Methods.
